# Supplementary material for: The transcription factor GATA1 and the histone methyltransferase SET7 interact to promote VEGF-mediated angiogenesis and tumor growth and predict clinical outcome of breast cancer
Source: PubMed Central journal article supplement (PMC4891089; doi:10.18632/oncotarget.7126), 2016-02-02
Supplement: oncotarget-07-09859-s001.pdf [file oncotarget-07-09859-s001.pdf]

## The transcription factor GATA1 and the histone methyltransferase SET7 interact to promote VEGF-mediated angiogenesis and tumor growth and predict clinical outcome of breast cancer

### Supplementary Materials

**Supplementary Table S1: Cox univariate and multivariate analysis of disease-free survival and overall survival in patients with breast cancer**

| Factor                           | Univariate             |       |             | Multivariate |       |             |
|----------------------------------|------------------------|-------|-------------|--------------|-------|-------------|
|                                  | P value                | HR    | 95% CI      | P value      | HR    | 95% CI      |
| Disease-free survival            |                        |       |             |              |       |             |
| Tumor size: ≤ 20 vs > 20 mm      | 4.6 × 10 <sup>-5</sup> | 3.442 | 1.905–6.711 | 0.002        | 2.768 | 1.823–5.457 |
| Lymph node: negative vs positive | 0.001                  | 2.917 | 1.867–5.791 | 0.005        | 2.226 | 1.349–4.887 |
| Grade: I vs II vs III            | 0.002                  | 2.936 | 1.878–5.846 | 0.039        | 1.745 | 1.086–3.652 |
| ER: negative vs positive         | 0.0001                 | 0.165 | 0.067–0.405 | 0.264        | 0.508 | 0.263–1.239 |
| PR: negative vs positive         | 0.027                  | 0.388 | 0.168–0.698 | 0.384        | 0.612 | 0.304–1.428 |
| HER2: negative vs positive       | 0.069                  | 1.420 | 0.946–3.497 | 0.198        | 1.354 | 0.891–2.365 |
| GATA1: negative vs positive      | 0.001                  | 2.916 | 1.847–5.700 | 0.003        | 2.512 | 1.635–5.186 |
| SET7: negative vs positive       | 0.001                  | 2.908 | 1.821–5.688 | 0.024        | 1.824 | 1.128–3.941 |
| Overall survival                 |                        |       |             |              |       |             |
| Tumor size: ≤ 20 vs > 20 mm      | 0.0002                 | 6.523 | 3.423–10.45 | 0.002        | 5.041 | 2.215–9.584 |
| Lymph node: negative vs positive | 0.001                  | 5.127 | 2.321–9.886 | 0.008        | 4.256 | 1.628–7.852 |
| Grade: I vs II vs III            | 0.0007                 | 5.786 | 2.845–10.06 | 0.026        | 3.014 | 1.565–6.952 |
| ER: negative vs positive         | 0.0002                 | 0.143 | 0.051–0.424 | 0.042        | 0.428 | 0.256–0.907 |
| PR: negative vs positive         | 0.133                  | 0.597 | 0.400–1.338 | 0.151        | 0.648 | 0.463–1.586 |
| HER2: negative vs positive       | 0.425                  | 1.143 | 0.742–2.076 | 0.574        | 1.135 | 0.693–1.983 |
| GATA1: negative vs positive      | 0.005                  | 4.188 | 1.887–7.839 | 0.027        | 2.941 | 1.504–6.548 |
| SET7: negative vs positive       | 0.006                  | 4.059 | 1.727–7.479 | 0.042        | 2.524 | 1.394–5.412 |

**Supplementary Table S2: Correlation of GATA1 and SET7 status with clinical factors\***

| Clinical characteristics | Total cases | GATA1 low | GATA1 high | <i>P</i> value | SET7 low | SET7 high | <i>P</i> value |
|--------------------------|-------------|-----------|------------|----------------|----------|-----------|----------------|
| Age                      |             |           |            | 0.238          |          |           | 0.205          |
| ≤ 50 years               | 48          | 19        | 29         |                | 23       | 25        |                |
| > 50 years               | 32          | 17        | 15         |                | 20       | 12        |                |
| Tumor size               |             |           |            | 0.001          |          |           | 0.001          |
| ≤ 20 mm                  | 42          | 26        | 16         |                | 30       | 12        |                |
| > 20 mm                  | 38          | 10        | 28         |                | 13       | 25        |                |
| Nodal status             |             |           |            | 0.004          |          |           | 0.016          |
| Negative                 | 46          | 27        | 19         |                | 30       | 16        |                |
| Positive                 | 34          | 9         | 25         |                | 13       | 21        |                |
| Grade                    |             |           |            | 0.001          |          |           | 0.002          |
| I                        | 18          | 12        | 6          |                | 13       | 5         |                |
| II                       | 37          | 19        | 18         |                | 23       | 14        |                |
| III                      | 25          | 5         | 20         |                | 7        | 18        |                |
| ERα                      |             |           |            | 0.049          |          |           | 0.033          |
| Negative                 | 27          | 8         | 19         |                | 10       | 17        |                |
| Positive                 | 53          | 28        | 25         |                | 33       | 20        |                |
| PR                       |             |           |            | 0.178          |          |           | 0.226          |
| Negative                 | 31          | 11        | 20         |                | 14       | 17        |                |
| Positive                 | 49          | 25        | 24         |                | 29       | 20        |                |
| HER2                     |             |           |            | 0.609          |          |           | 0.899          |
| Negative                 | 60          | 28        | 32         |                | 32       | 28        |                |
| Positive                 | 20          | 8         | 12         |                | 11       | 9         |                |

\**P* values were assessed by Pearson chi-square test.

**Supplementary Table S3: Baseline patient characteristics**

| Characteristic      | No. | %    |
|---------------------|-----|------|
| Age                 |     |      |
| ≤ 50 years          | 48  | 60.0 |
| > 50 years          | 32  | 40.0 |
| Stage               |     |      |
| I                   | 18  | 22.5 |
| II                  | 41  | 51.3 |
| III                 | 21  | 26.2 |
| Nodal status        |     |      |
| Negative            | 46  | 57.5 |
| Positive            | 34  | 42.5 |
| Grade               |     |      |
| I                   | 18  | 22.5 |
| II                  | 37  | 46.3 |
| III                 | 25  | 31.2 |
| ER                  |     |      |
| Negative            | 27  | 33.8 |
| Positive            | 53  | 66.2 |
| PR                  |     |      |
| Negative            | 31  | 38.8 |
| Positive            | 49  | 61.2 |
| HER2                |     |      |
| Negative            | 60  | 75.0 |
| Positive            | 20  | 25.0 |
| Subtype             |     |      |
| Luminal A           | 38  | 47.5 |
| Luminal B           | 22  | 27.5 |
| HER2 overexpression | 8   | 10.0 |
| Basal-like          | 12  | 15.0 |

## Supplementary Table S4: Sequences for shRNAs, RT-PCR, ChIP and EMSA

### Supplementary Table S4A: The cDNA target sequences of shRNAs

| Gene    | Target sequence (5' → 3') |
|---------|---------------------------|
| GATA1-1 | TAGTGCTTATGGGGGCCCTGACTTT |
| GATA1-2 | GAAGCGCCTGATTGTCAGTAAACGG |
| SET7-1  | GGGCACCTGGACGATGACGGA     |
| SET7-2  | GCCTTGTAGGAGAAGTAAA       |
| VEGFR2  | TAAACAGGAGGAGAGCTCAGTGTGG |

### Supplementary Table S4B: Primers used for real-time RT-PCR

| Gene                                        | Forward (5' → 3')                                                                                | Reverse (5' → 3')                                                                             |
|---------------------------------------------|--------------------------------------------------------------------------------------------------|-----------------------------------------------------------------------------------------------|
| GATA1                                       | GGAGACTTTGAAGACAGAG                                                                              | GGAGAGGAATAGGCTGCTG                                                                           |
| SET7                                        | CGAATTACACACCAAGAGGTT                                                                            | TAGGCAACGGTGAGCTCTTC                                                                          |
| VEGF <sub>121</sub>                         | ATAGAGCAAGACAAGAAAATG                                                                            | ATCGTTCTGTATCAGTCTTTCT                                                                        |
| VEGF <sub>165</sub><br>bcl-xL<br>Myb<br>Myc | AGAGCAAGACAAGAAAATCC<br>GAGCCTTGGATCCAGGAGAA<br>TGTTCTCAAAGCATTTACAGTACC<br>GGCTCTCCTTGCAGCTGCTT | TACAAACAAATGCTTTCTCC<br>CATGCCCGTCAGGAACCAGC<br>GATGTCATCTGCTCCTCCATC<br>TCGTCGCAGTAGAAATACGG |

### Supplementary Table S4C: Primers used for ChIP

| VEGF Promoter | Forward (5' → 3')     | Reverse (5' → 3')     |
|---------------|-----------------------|-----------------------|
| -23~+43       | AAGTCGGCTGGTAGCGGG    | CGCCACGACCTCCGAGCTA   |
| -1241~-1174   | CAGAAGATGAGCTATGAGTCT | AGAGCTCCCACCAGGCCA    |
| -206~-114     | GGTGGGGGTCGAGCTTCC    | CCTTCCACACGCGGCTCG    |
| -113~-6       | GCTGAGGCTCGCCTGTCC    | CCCGCTACCAGCCGACTT    |
| +49~+109      | GGCTAGCACCAGCGCTCTG   | GTGAGTCCGCTGACCGGTC   |
| +132~+244     | AGGGCGCTCGGTGCTGGA    | CAAGTGGGGAATGGCAAGCA  |
| +295~+349     | TACTTCCCAAATCACTGTGG  | CTCTGGAGCTCTTGCTACCTC |

### Supplementary Table S4D: Sequences of the oligonucleotides used for EMSA

| Probe  | Forward (5' → 3')              | Reverse (5' → 3')              |
|--------|--------------------------------|--------------------------------|
| GATC   | TGGTAGCGGGGAGGATCGCGGAGGCTTGGG | CCCAAGCCTCCGCGATCCTCCCCGCTACCA |
| GATC-M | TGGTAGCGGGGAGTCGAGCGGAGGCTTGGG | CCCAAGCCTCCGCTCGACTCCCCGCTACCA |
| GATA   | CTGGGCTTGGGCTGATAGAAGCCTTGGCCC | GGGCCAAGGCTTCTATCAGCCCAAGCCCAG |

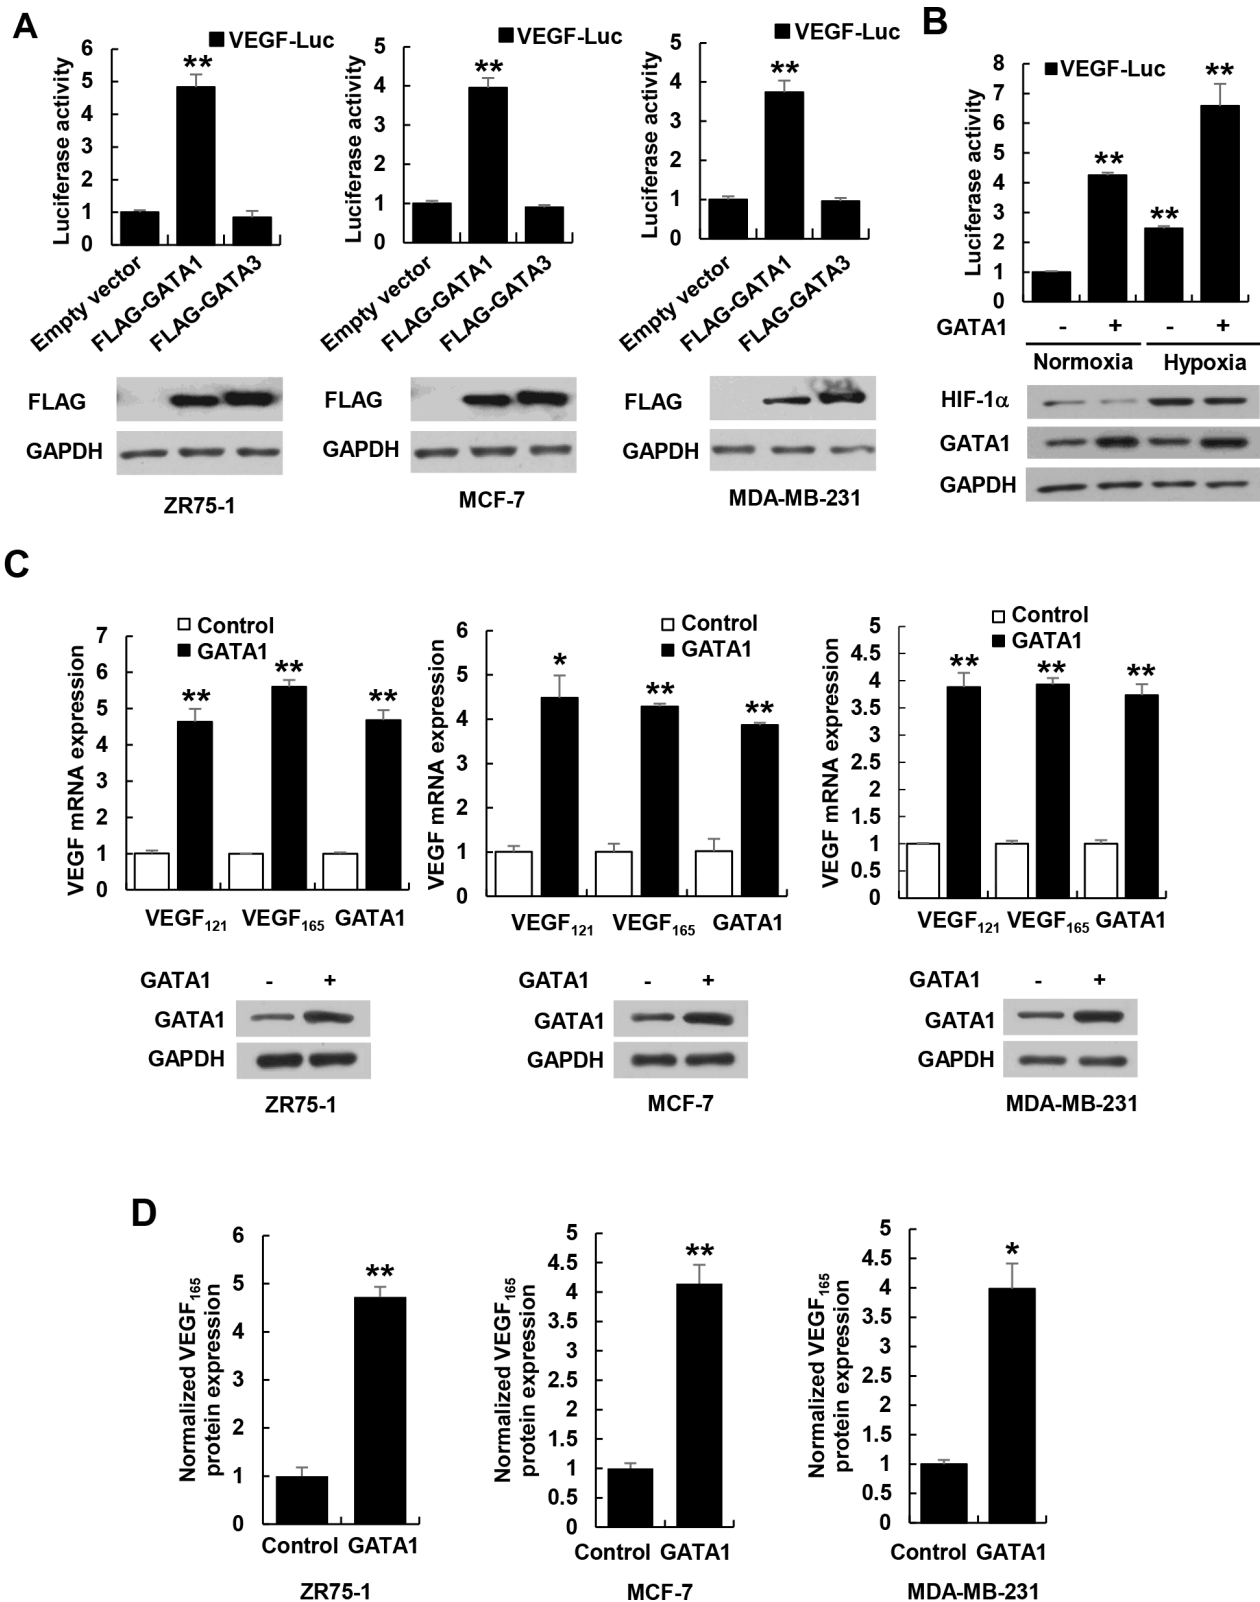

**Supplementary Figure S1: GATA1 modulates VEGF expression in breast cancer cells.** (A) Luciferase reporter assays in ZR75-1, MCF-7 and MDA-MB-231 cells cotransfected with VEGF-Luc and GATA1, GATA3 or empty vector (control). Representative Western blot shows the expression of GATA1 and GATA3. GAPDH was used as a loading control. (B) Luciferase reporter assays in MCF7 cells cotransfected with VEGF-Luc and GATA1 or empty vector (control) under normoxic or hypoxic (1% O<sub>2</sub>) conditions. Representative Western blot shows the expression of HIF-1 $\alpha$  and GATA1. (C) Real-time RT-PCR analyses of VEGF<sub>121</sub> and VEGF<sub>165</sub> expression in ZR75-1, MCF-7 and MDA-MB-231 cells infected with lentivirus carrying GATA1 or empty vector (control). Representative Western blot indicates the expression of GATA1. (D) VEGF concentration in cell supernatants from ZR75-1, MCF7 and MDA-MB-231 cells infected as in (C). All values shown are mean  $\pm$  SD of triplicate measurements that have been repeated 3 times with similar results. \* $P$  < 0.05, \*\* $P$  < 0.01 versus empty vector.

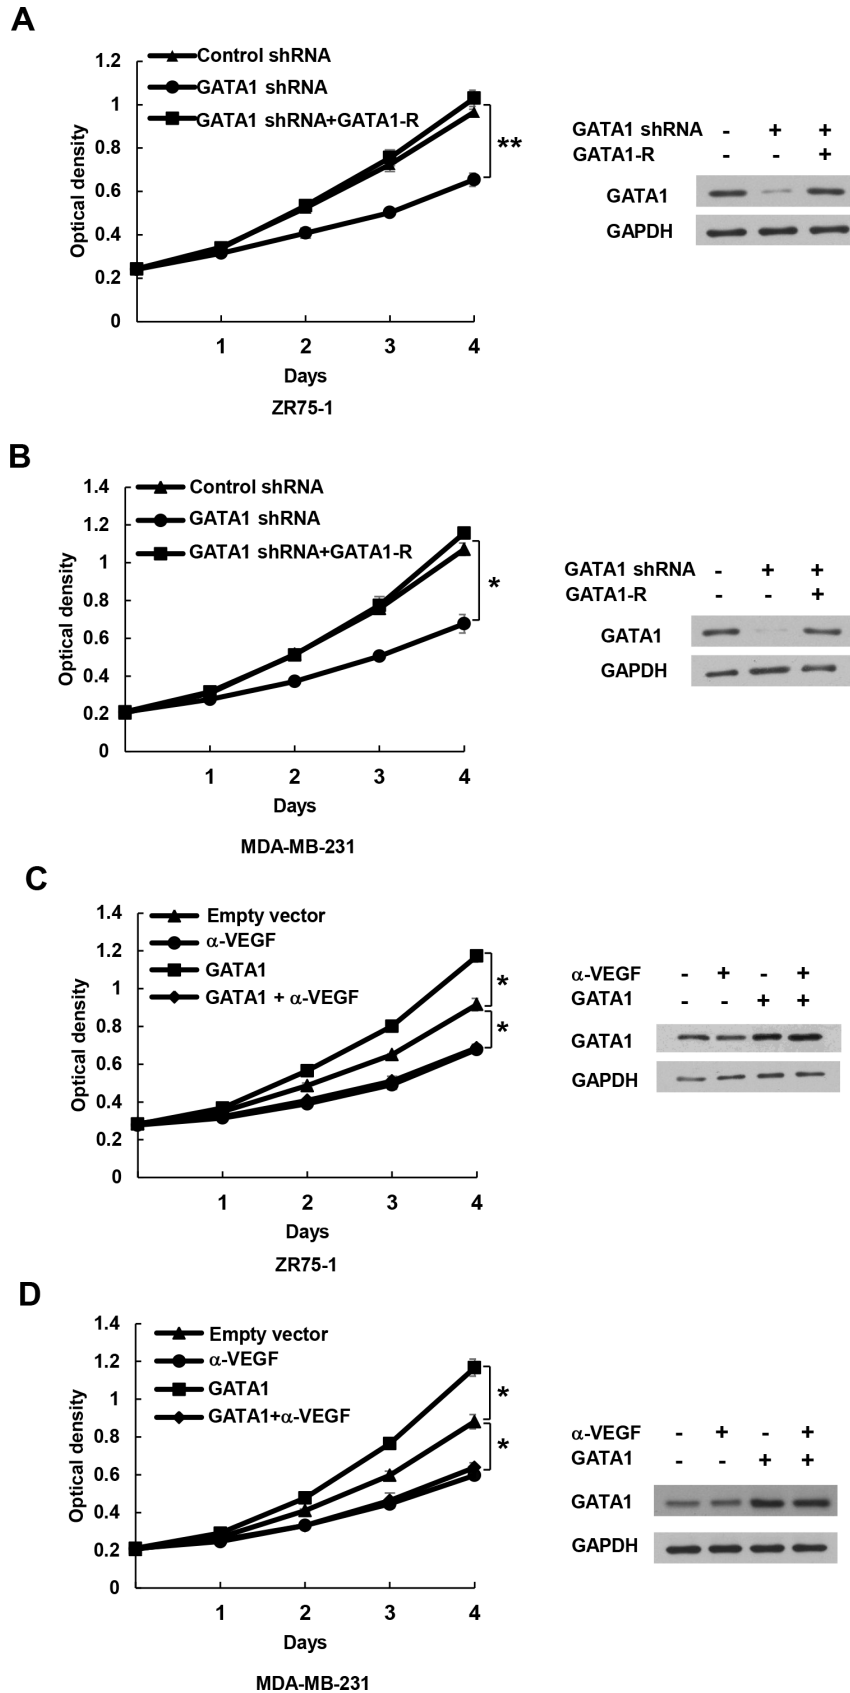

**Supplementary Figure S2: Cancer cell-secreted VEGF regulated by GATA1 controls HUVEC proliferation.** (A, B) Cell proliferation assays in HUVEC cells cultured in conditioned medium from ZR75-1 (A) and MDA-MB-231 (B) cells stably infected with GATA1 shRNA or GATA1 shRNA plus shRNA-resistant GATA1 (GATA1-R). Representative Western blot shows GATA1 expression. (C, D) Cell proliferation assays in HUVEC cells cultured in conditioned medium from ZR75-1 (C) and MDA-MB-231(D) stably infected with GATA1 and treated with a VEGF neutralizing antibody ( $\alpha$ -VEGF). Representative Western blot shows the expression of GATA1. All values shown are mean  $\pm$  SD of triplicate measurements that have been repeated 3 times with similar results. \* $P < 0.05$ , \*\* $P < 0.01$ .

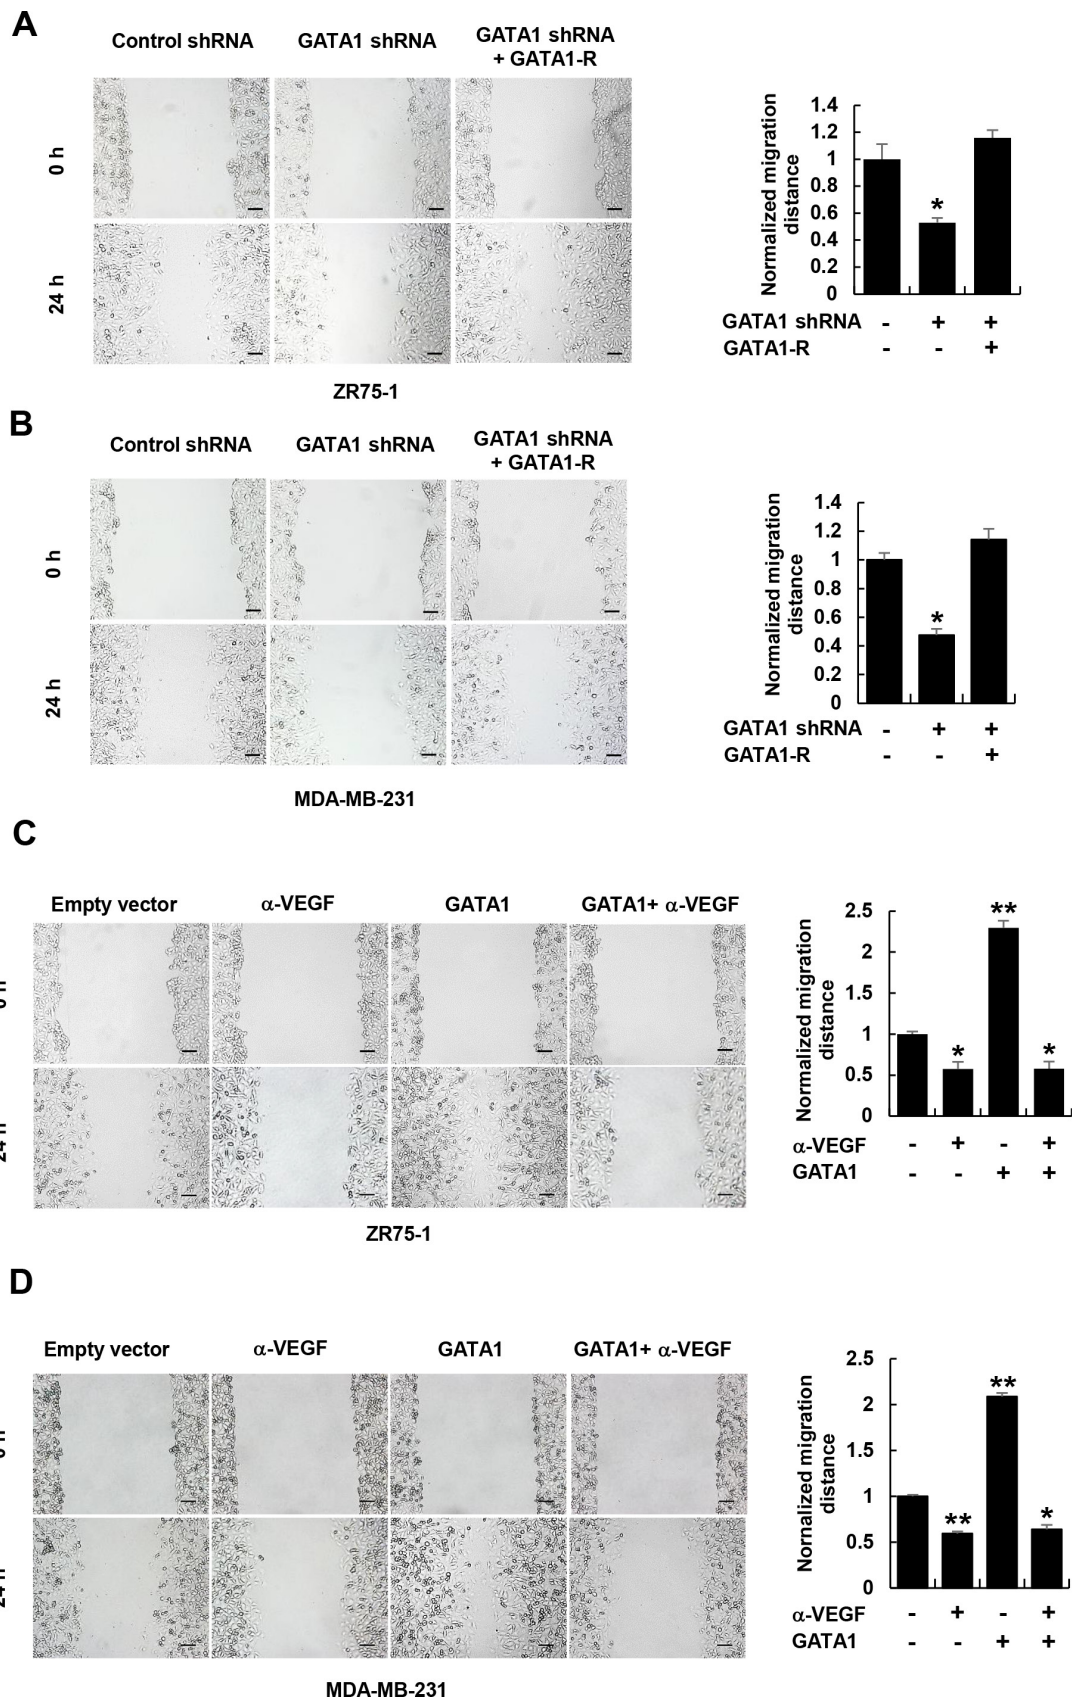

**Supplementary Figure S3: Cancer cell-secreted VEGF regulated by GATA1 modulates HUVEC migration.** (A, B) Wound healing assays for HUVEC cells cultured in conditioned medium from ZR75-1 (A) and MDA-MB-231 (B) cells stably infected with GATA1 shRNA or GATA1 shRNA plus GATA1-R. Scale bar: 100  $\mu$ m. (C, D) Wound healing assays in HUVEC cells cultured in conditioned medium from ZR75-1 (C) and MDA-MB-231 (D) stably infected with GATA1 and treated with a VEGF neutralizing antibody. Scale bar: 100  $\mu$ m. All values shown are mean  $\pm$  SD of triplicate measurements that have been repeated 3 times with similar results. \* $P$  < 0.05 versus control shRNA. \*\* $P$  < 0.01 versus empty vector.

**A**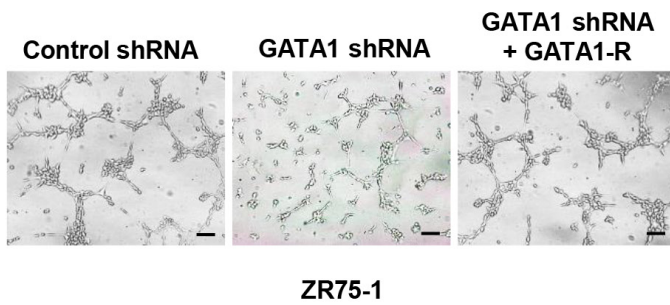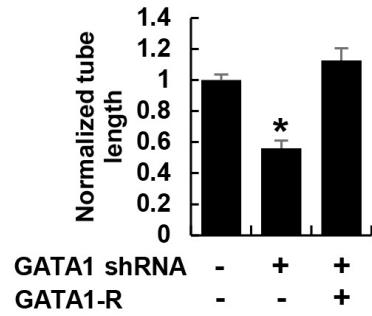**B**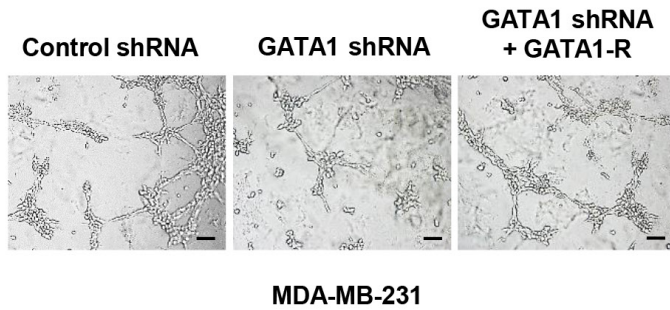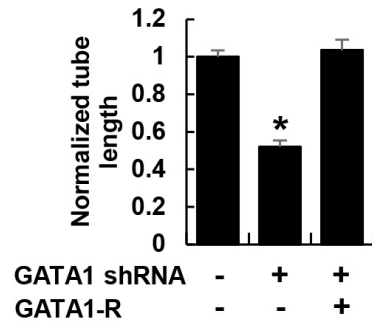**C**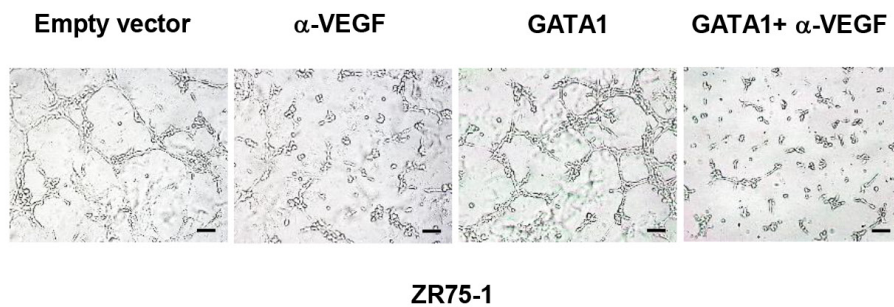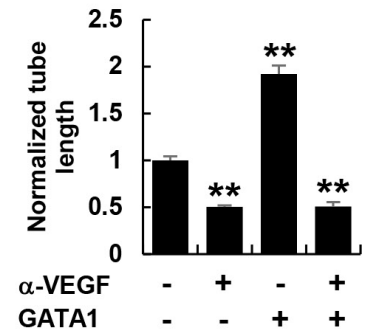**D**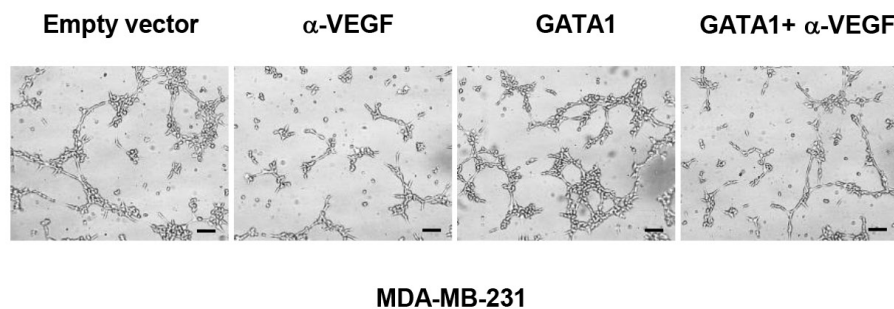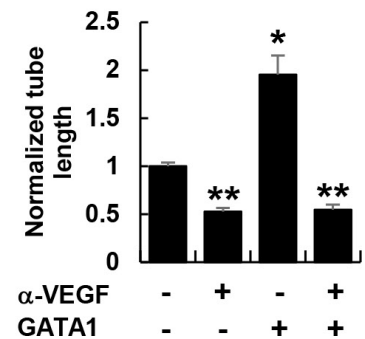

**Supplementary Figure S4: Cancer cell-secreted VEGF regulated by GATA1 is required for HUVEC tube formation.** (A, B) Tube formation assays for HUVEC cells cultured in conditioned medium from ZR75-1 (A) and MDA-MB-231 (B) cells stably infected with GATA1 shRNA or GATA1 shRNA plus GATA1-R. Scale bar: 100  $\mu$ m. (C, D) Tube formation assays for HUVEC cells cultured in conditioned medium from ZR75-1 (C) and MDA-MB-231 (D) cells stably infected with GATA1 and treated with  $\alpha$ -VEGF. Scale bar: 100  $\mu$ m. Data shown are mean  $\pm$  SD of triplicate measurements that have been repeated 3 times with similar results. \* $P$  < 0.05, \*\* $P$  < 0.01 versus control shRNA or empty vector.



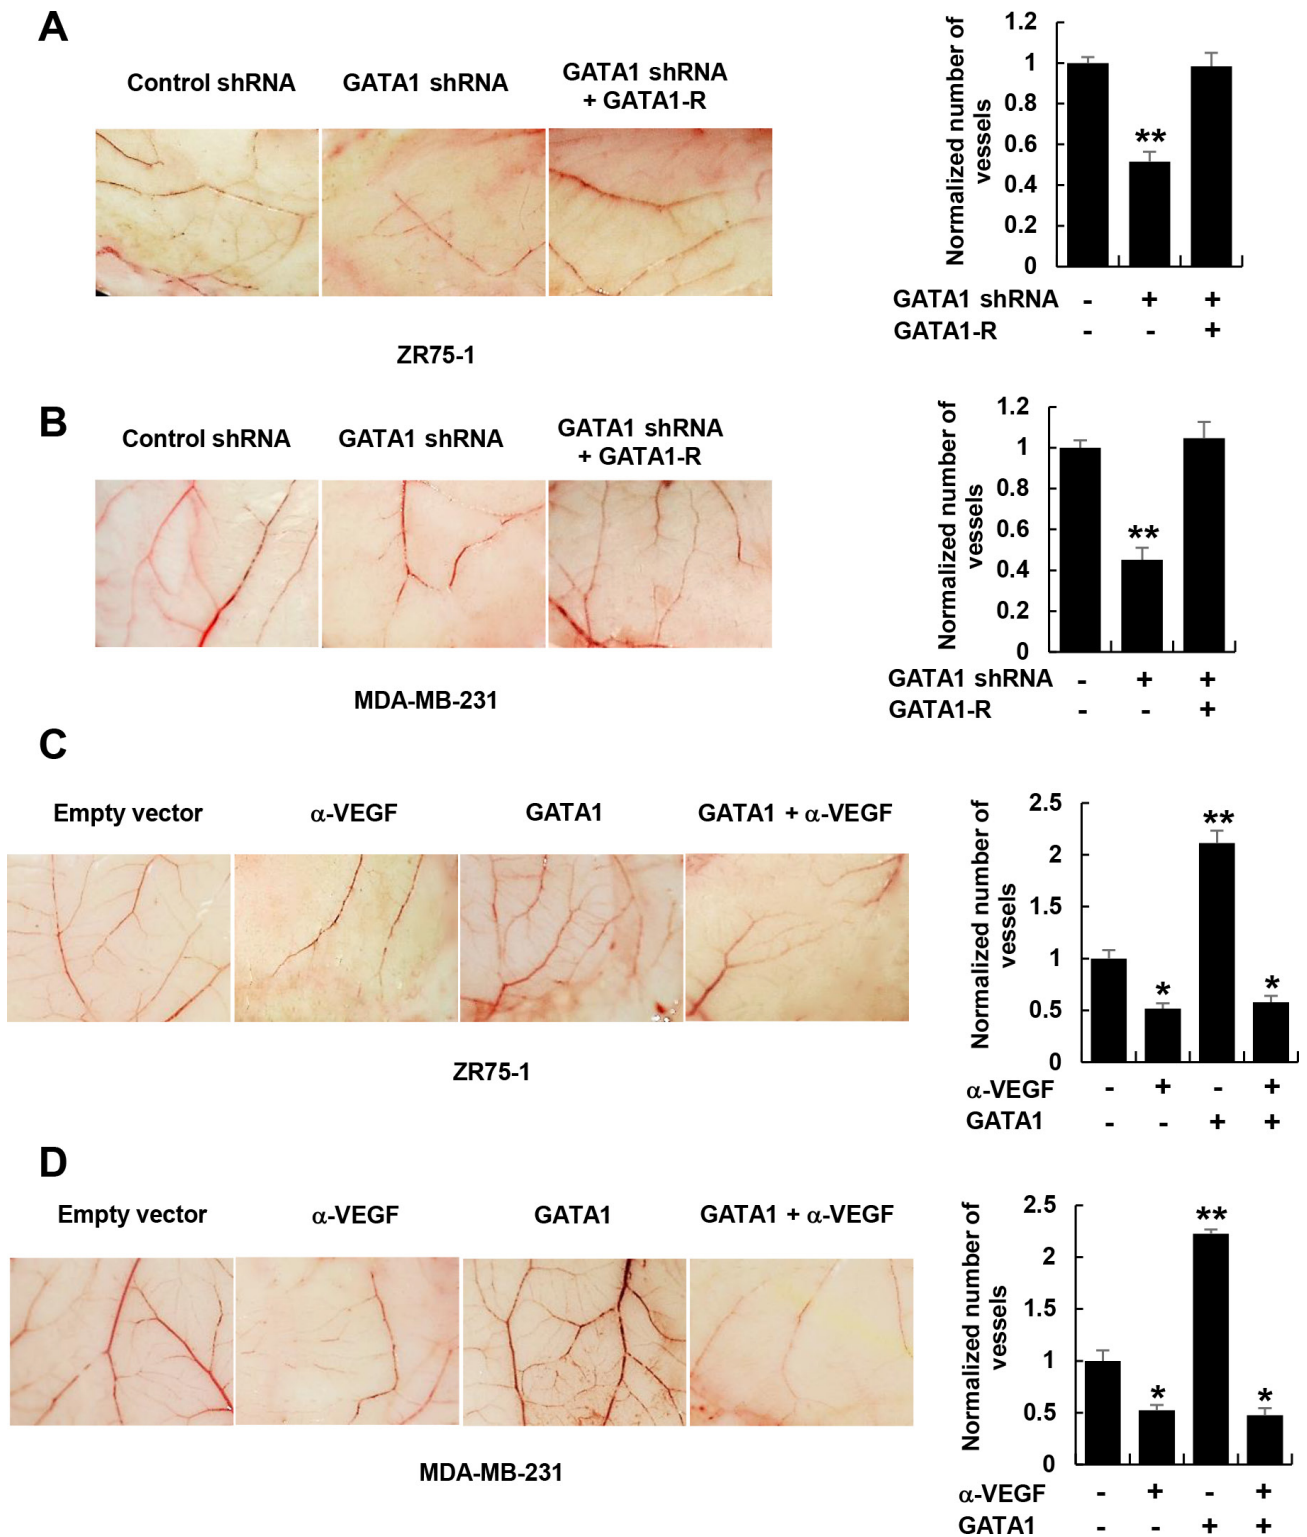

**Supplementary Figure S5: Cancer cell-secreted VEGF regulated by GATA1 is responsible for angiogenesis.** (A, B) CAM assays with conditioned medium from ZR75-1 (A) and MDA-MB-231 (B) cells stably infected with GATA1 shRNA or GATA1 shRNA plus GATA1-R. (C, D) CAM assays with conditioned medium from ZR75-1 (C) and MDA-MB-231 (D) cells stably infected with GATA1 and treated with  $\alpha$ -VEGF. All values shown are mean  $\pm$  SD of triplicate measurements and have been repeated 3 times with similar results (A–D). \* $P < 0.05$ , \*\* $P < 0.01$  versus control shRNA or empty vector.

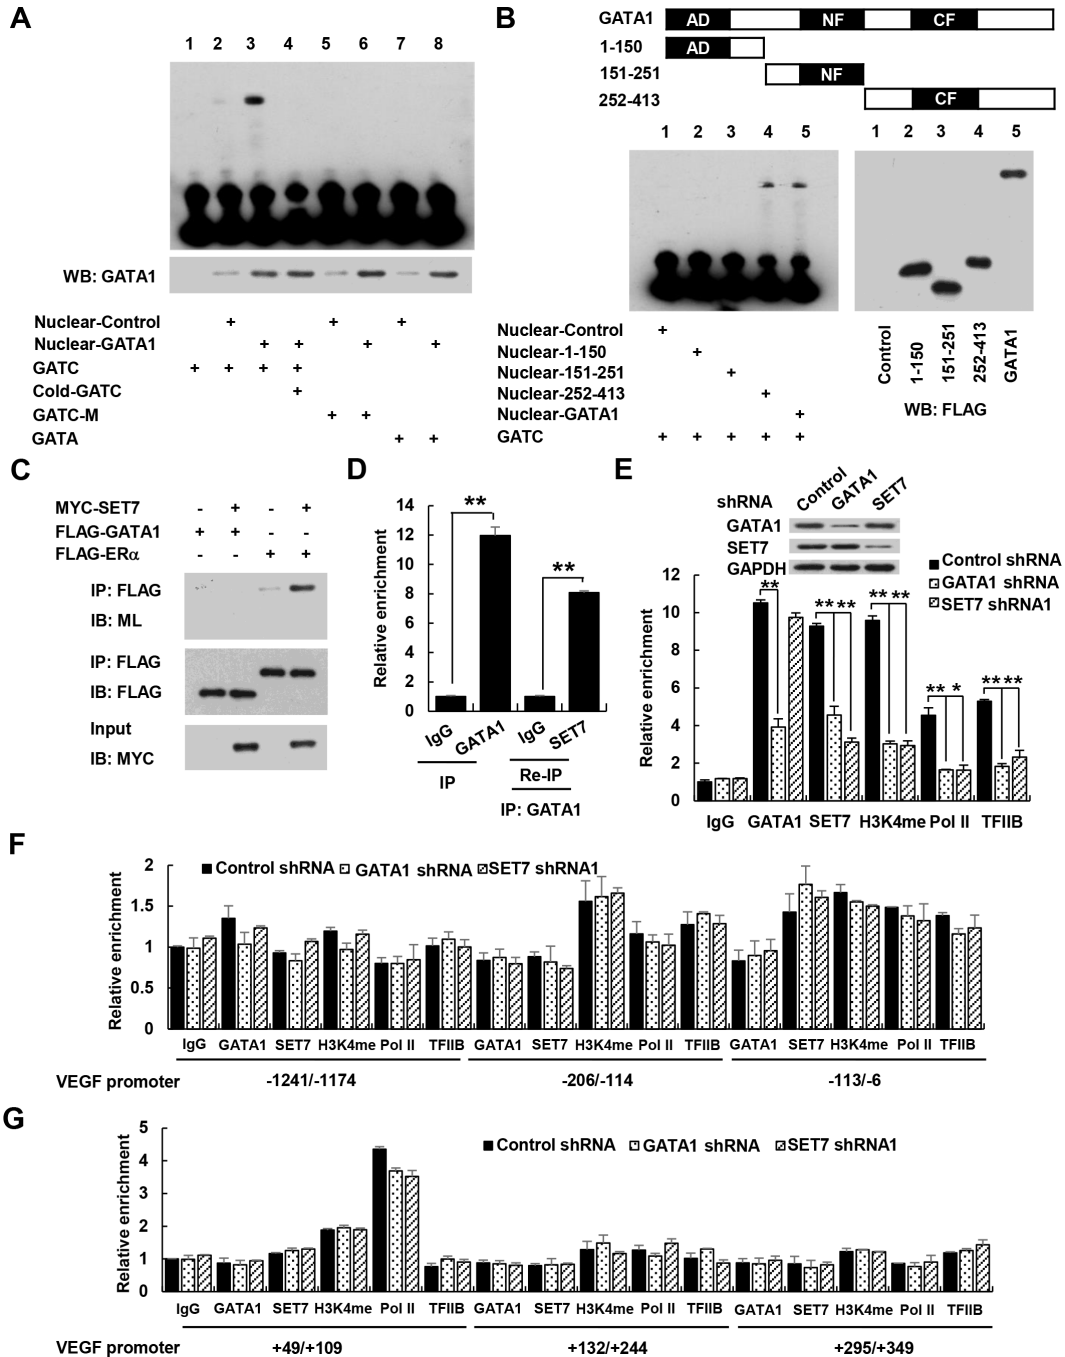

**Supplementary Figure S6: GATA1 binds to the GATC site of VEGF promoter and recruits SET7, TFIIB and RNA polymerase II to the VEGF promoter.**

(A) EMSA assay of GATA1 binding site in the VEGF promoter. Nuclear extracts from GATA1 knockdown MCF7 cells transfected with empty vector or FLAG-tagged GATA1 were incubated with different biotin-labelled probes containing the GATA or GATC site or mutated GATC site (GATC-M) of the VEGF promoter as indicated. For competition experiments, a 100-fold molar excess of unlabeled GATC was mixed with the biotin-labelled probe. Western blot shows the expression of GATA1 with anti-GATA1. (B) EMSA assay of the GATA1 domain that binds to the VEGF promoter. Nuclear extracts from GATA1 knockdown MCF7 cells transfected with empty vector (control), FLAG-tagged GATA1 or FLAG-tagged GATA1 deletion mutants were incubated with biotin-labelled probes containing the GATC site, as indicated. Western blot shows the expression of GATA1 and its deletion mutants with anti-FLAG. AD, activation domain; NF, N-terminal zinc finger; CF, C-terminal zinc finger. (C) SET7 does not methylate GATA1. Cell lysates from MCF7 cells transfected with MYC-tagged SET7 and FLAG-tagged GATA1 or ER $\alpha$  were immunoprecipitated (IP) with FLAG antibodies, followed by immunoblotting (IB) with the indicated antibodies. ML, anti-methylated lysine. (D) Re-ChIP analysis of the occupancy of GATA1 and SET7 on VEGF promoter (-23/+43) in MDA-MB-231 cells. (E) ChIP analysis of MDA-MB-231 cells stably infected with lentivirus carrying GATA1 shRNA or SET7 shRNA1 on VEGF promoter (-23/+43) with the indicated antibodies. Western blot shows the knockdown effects of GATA1 and SET7. Data shown are mean  $\pm$  SD of triplicate measurements and have been repeated 3 times with similar results (D, E). \* $P$  < 0.05, \*\* $P$  < 0.01. (F, G) ChIP analysis of MCF7 cells stably as infected as in Figure. 4F on the indicated regions of the VEGF promoter with the indicated antibodies.

**A**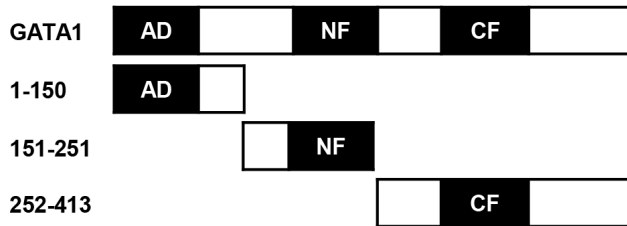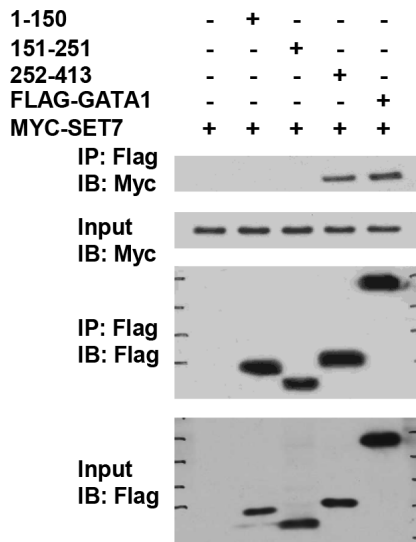**B**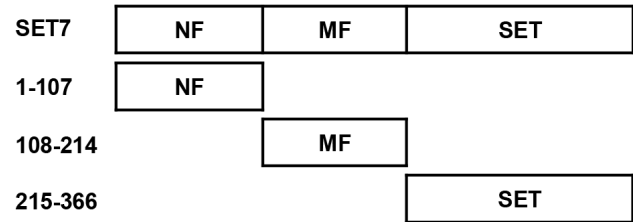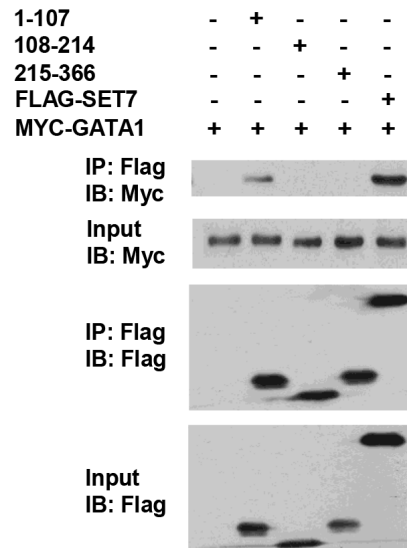**C**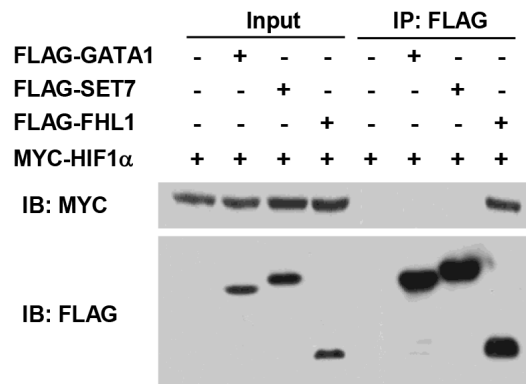

**Supplementary Figure S7: Mapping of the GATA1 and SET7 interaction domains.** (A) Mapping of interaction region of SET7 in GATA1. HEK293T cells were cotransfected with MYC-tagged SET7 and FLAG-tagged GATA1 or its deletion mutants. Cell lysates were immunoprecipitated with anti-FLAG, followed by immunoblotting with the indicated antibodies. Schematic diagram of GATA1 and its deletion mutants is shown. AD, activation domain; NF, N-terminal zinc finger; CF, C-terminal zinc finger. (B) Mapping of the GATA1 interaction region in SET7. HEK293T cells were cotransfected with MYC-tagged GATA1 and FLAG-tagged SET7 or its deletion mutants. Cell lysates were immunoprecipitated and analyzed as in (A). Schematic diagram of SET7 and its deletion mutants is shown. NF, N-terminal fragment; MF, middle region fragment; SET, SET domain-containing fragment. (C) Interaction of GATA1, SET7, and FHL1 with HIF-1 $\alpha$ . HEK293T cells were cotransfected with MYC-tagged HIF-1 $\alpha$  and FLAG-tagged GATA1, SET7 or FHL1. Cell lysates were immunoprecipitated with anti-FLAG, followed by immunoblotting with the indicated antibodies.

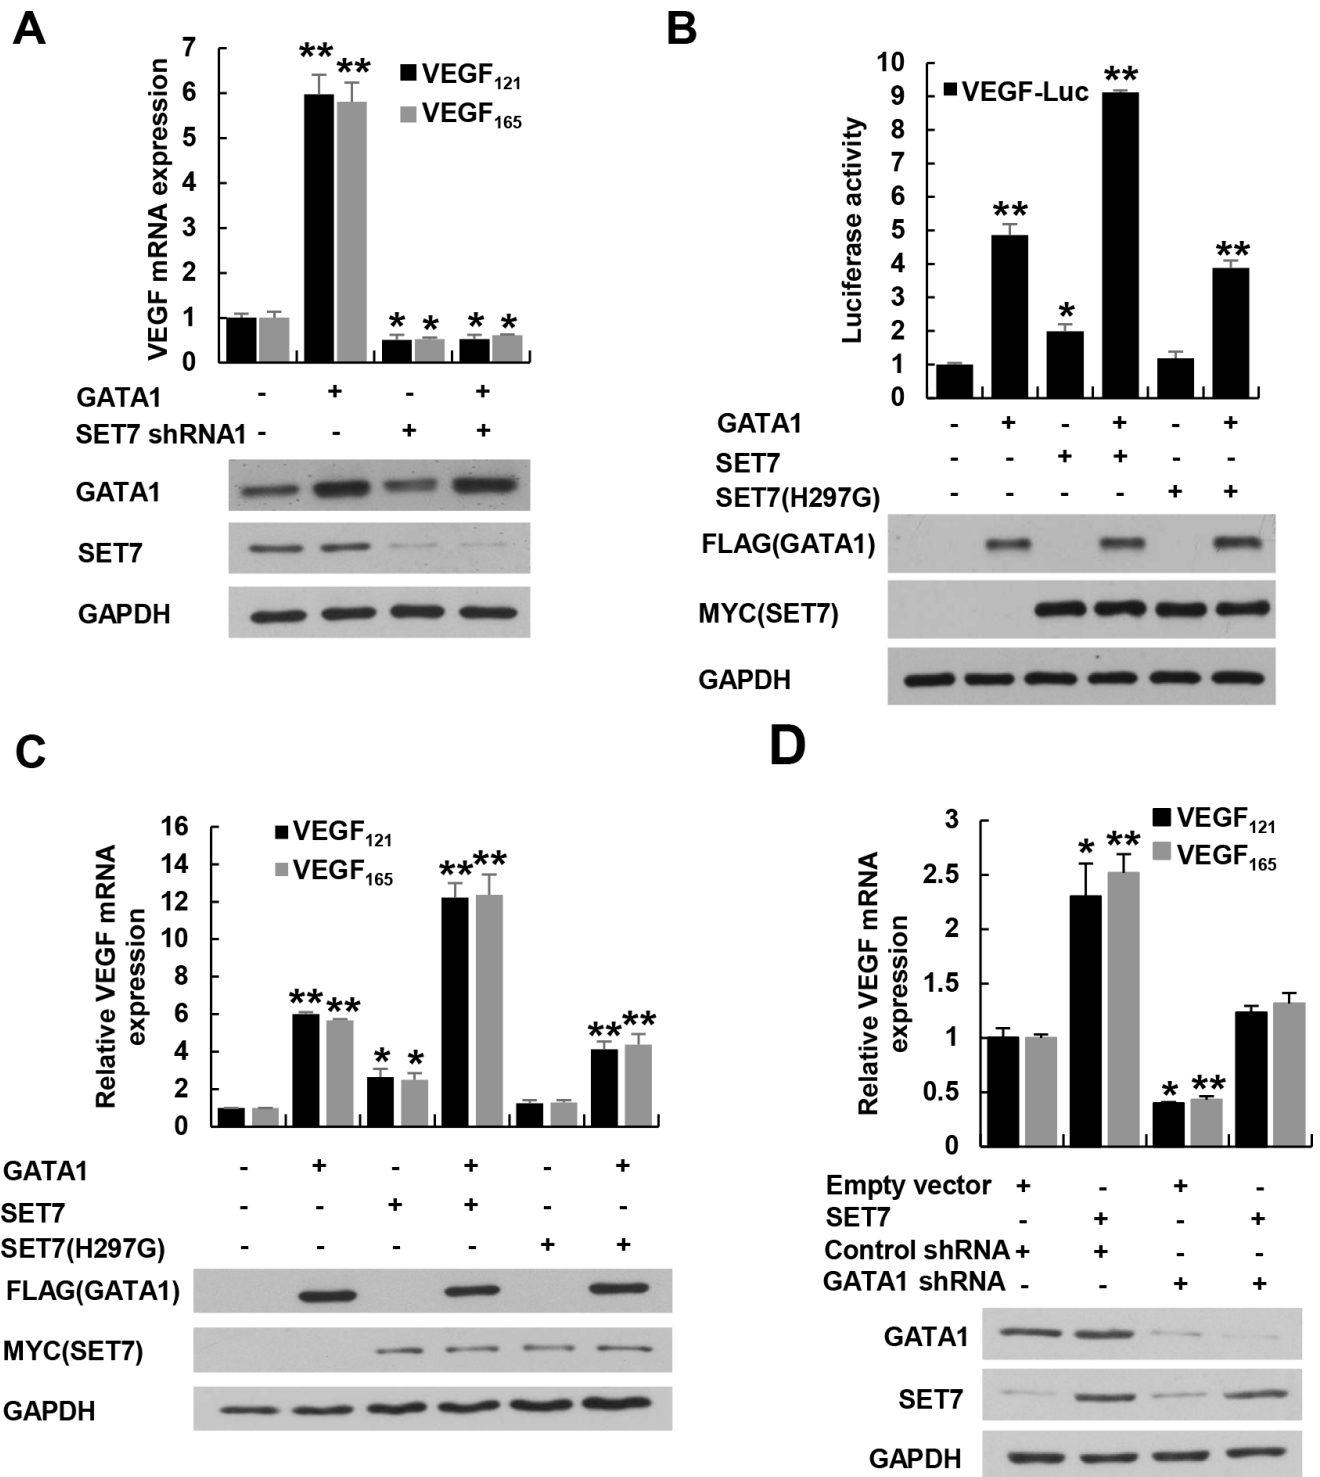

**Supplementary Figure S8: GATA1 regulates VEGF expression through SET7.** (A) Real-time RT-PCR analysis of VEGF<sub>121</sub> and VEGF<sub>165</sub> expression in MDA-MB-231 cells infected with lentiviruses carrying GATA1 or empty vector and SET7 shRNA1 or control shRNA. Western blot shows the expression of GATA1 and SET7. (B) Luciferase reporter assays in MCF7 cells cotransfected with VEGF-Luc, GATA1 and either SET7 or methyltransferase-deficient SET7 (H297G). Cell lysates were detected by Western blot with the indicated antibodies. (C) Real-time RT-PCR analysis of VEGF<sub>121</sub> and VEGF<sub>165</sub> expression in MCF7 cells cotransfected with GATA1 and either SET7 or SET7 (H297G). (D) Real-time RT-PCR analysis of VEGF<sub>121</sub> and VEGF<sub>165</sub> expression in MCF7 cells infected with lentiviruses carrying SET7 or empty vector and Control shRNA or GATA1 shRNA. Western blot shows the expression of GATA1 and SET7. All values shown are mean  $\pm$  SD of triplicate measurements and have been repeated 3 times with similar results. \* $P < 0.05$ , \*\* $P < 0.01$  versus corresponding control.

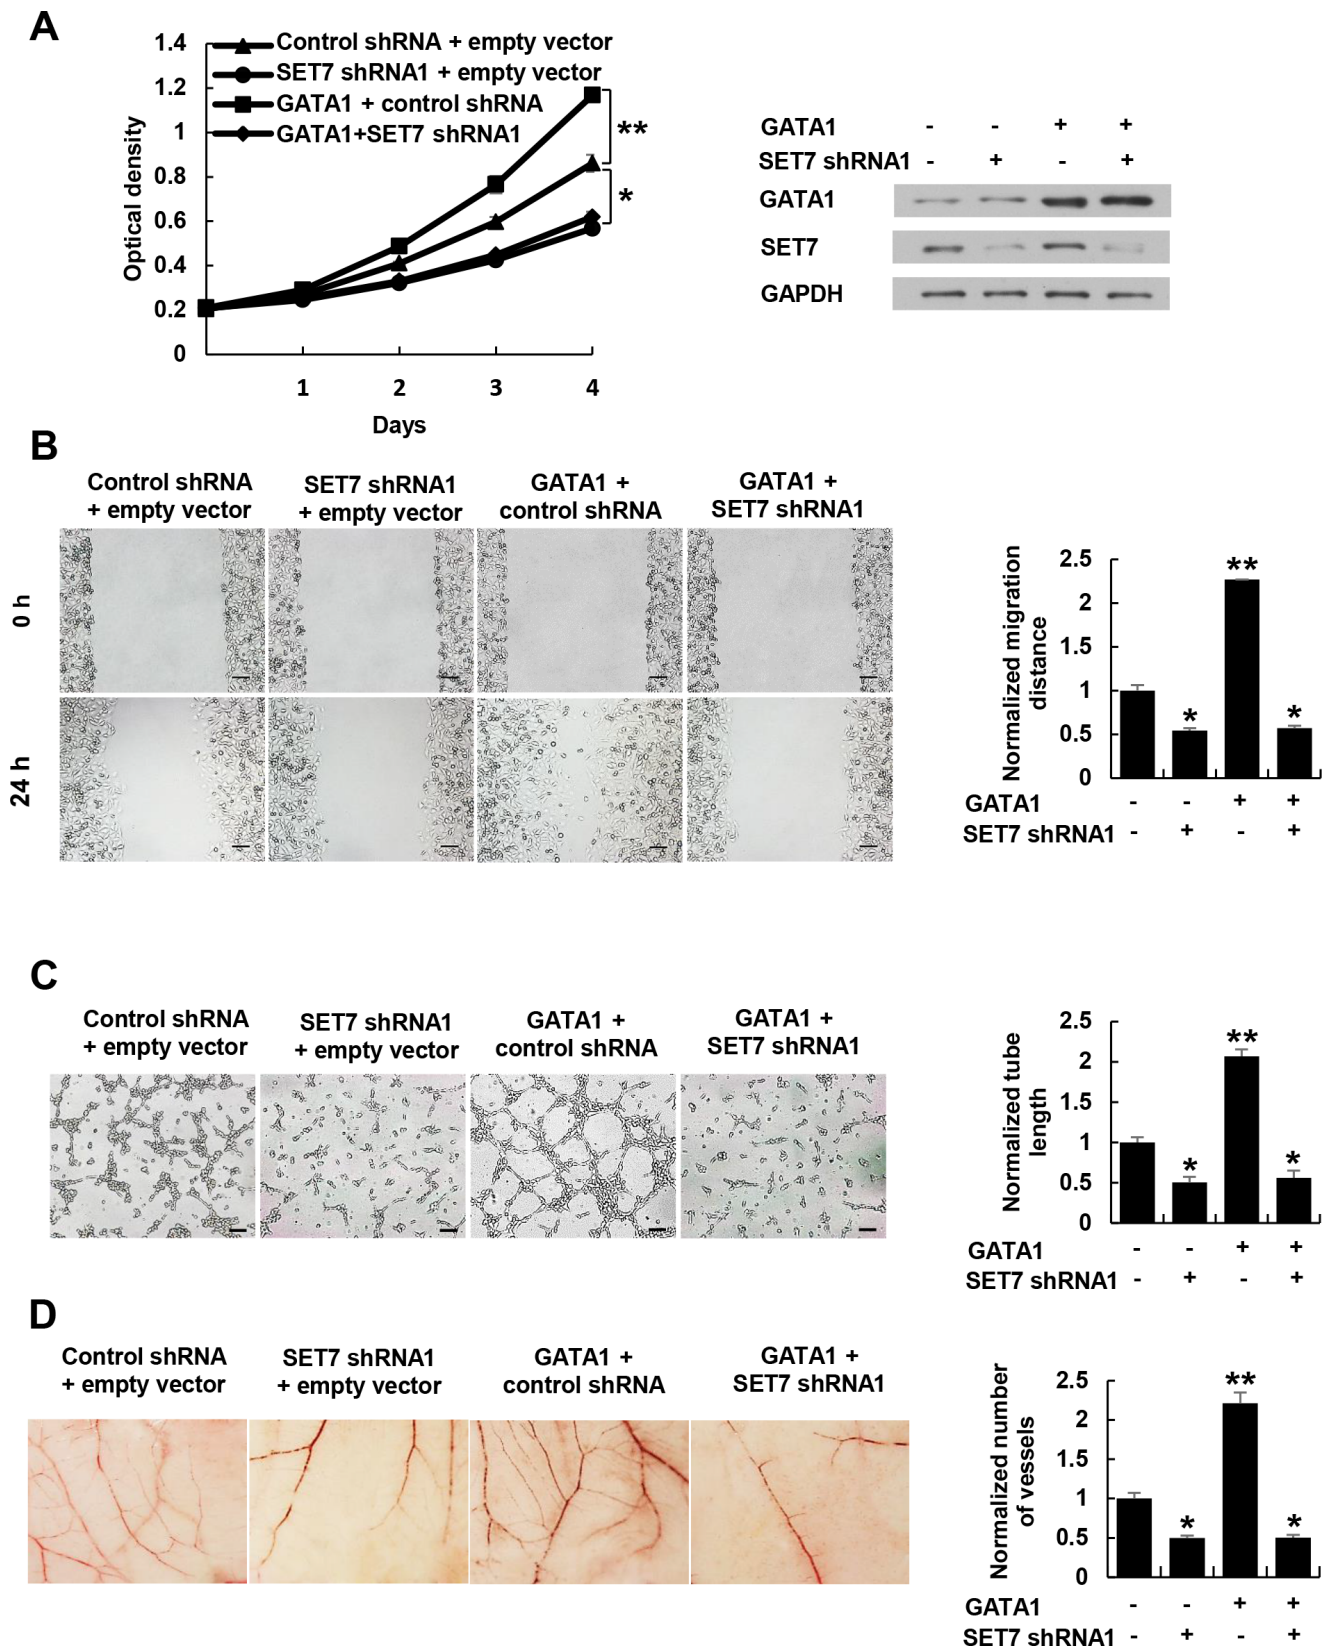

**Supplementary Figure S9: GATA1 regulates VEGF-induced HUVEC proliferation, migration and tube formation as well as angiogenesis via SET7.** (A) Cell proliferation assays in HUVEC cells cultured in conditioned medium from MDA-MB-231 cells stably infected with lentiviruses carrying GATA1 and SET7 shRNA. (B) Wound healing assays for HUVEC cells cultured in conditioned medium from MDA-MB-231 stably infected as in (A). Scale bar: 100  $\mu$ m. (C) Tube formation assays for HUVEC cells cultured in conditioned medium from MDA-MB-231 cells stably infected as in (A). Scale bar: 100  $\mu$ m. (D) CAM assays with conditioned medium from MDA-MB-231 cells stably infected as in (A). All values shown are mean  $\pm$  SD of triplicate measurements and have been repeated 3 times with similar results. \* $P$  < 0.05, \*\* $P$  < 0.01 versus corresponding control.

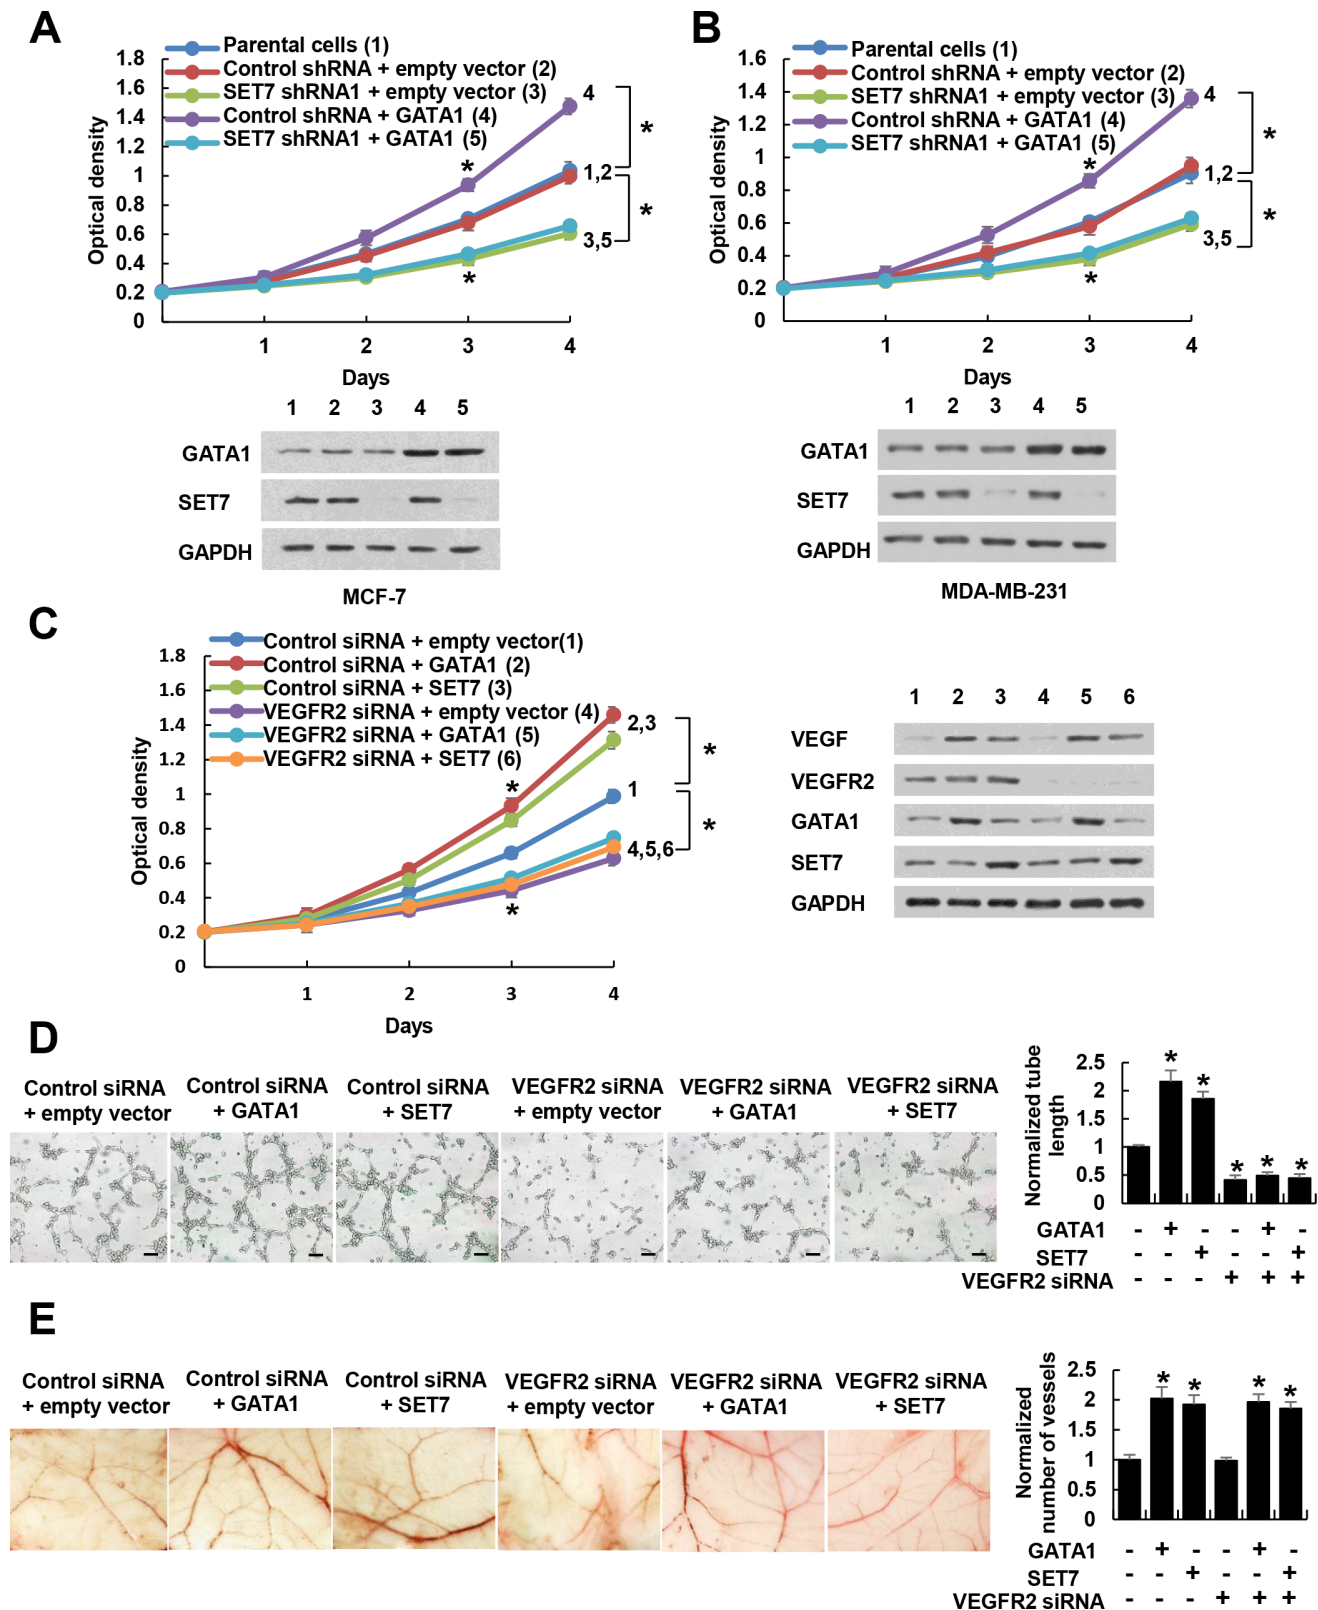

**Supplementary Figure S10: GATA1 regulates breast cancer cell proliferation through SET7.** (A, B) Cell proliferation assays in MCF7 (A) and MDA-MB-231 cells (B) stably infected with lentiviruses carrying the indicated constructs. Western blot shows the expression of GATA1 and SET7. All values shown are mean  $\pm$  SD of triplicate measurements and have been repeated 3 times with similar results.  $*P < 0.05$  on day 4. (C) Cell proliferation assays in MCF7 stably infected with lentiviruses carrying GATA1 or SET7 cells and transfected with control siRNA or VEGFR2 siRNA. Western blot shows the expression of VEGF, VEGFR2, GATA1 and SET7.  $*P < 0.05$  on day 4. (D) Tube formation assays for HUVEC cells transfected with control siRNA or VEGFR2 siRNA cells cultured in conditioned medium from MCF7 cells stably infected with lentiviruses carrying GATA1 or SET7. Scale bar: 100  $\mu$ m. (E) CAM assays with conditioned medium from MCF7 cells stably infected with lentiviruses carrying GATA1 or SET7 cells and transfected with control siRNA or VEGFR2 siRNA. All values shown are mean  $\pm$  SD of triplicate measurements and have been repeated 3 times with similar results.  $*P < 0.05$ , versus corresponding control.

**A**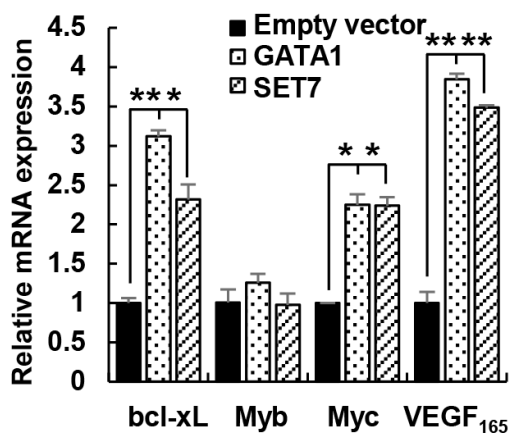

MDA-MB-231

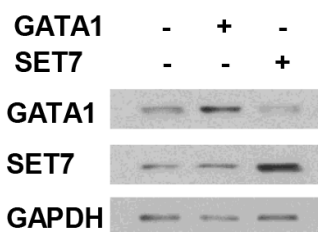**B**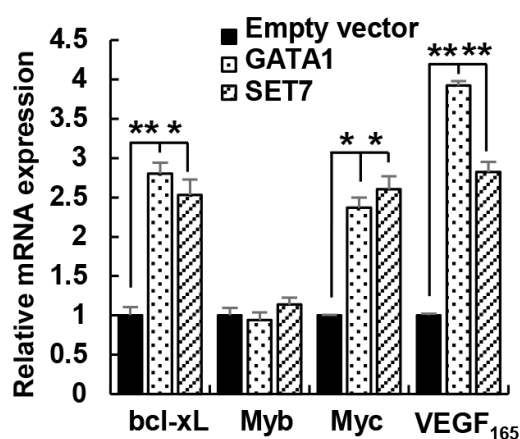

MCF7

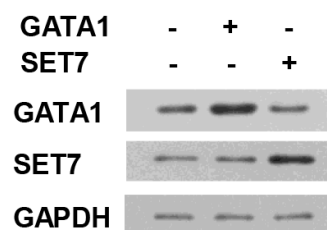**C**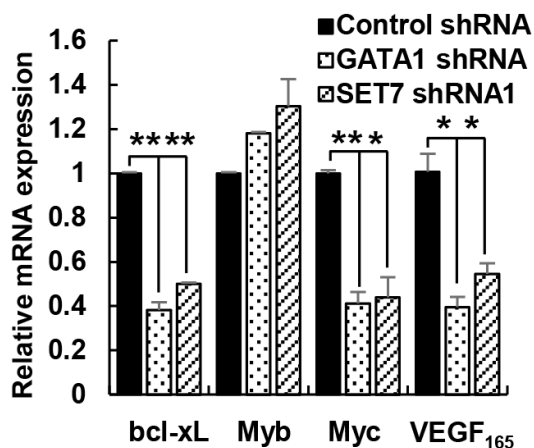

MDA-MB-231

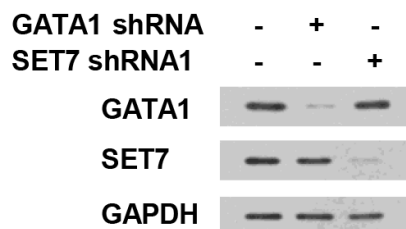**D**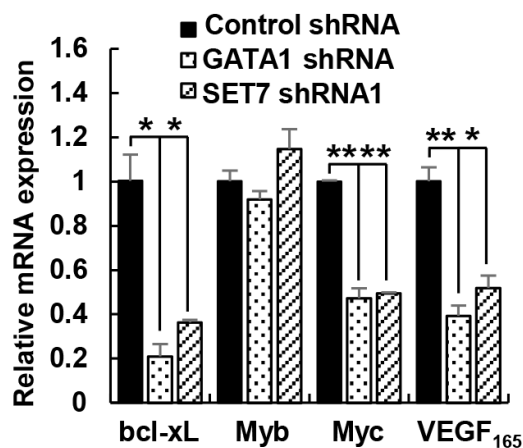

MCF7

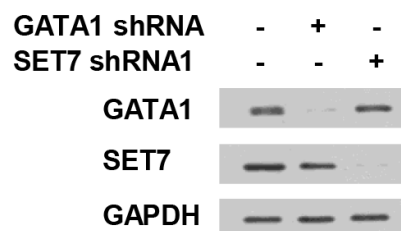

**Supplementary Figure S11: GATA1 and SET7 regulate the transcription of known GATA1 target genes.** (A, B) Real-time RT-PCR analysis of the transcription of bcl-xL, Myb and Myc in MDA-MB-231 (A) or MCF7 (B) cells infected with lentiviruses carrying GATA1 or SET7. VEGF<sub>165</sub> was used as a control for comparison. (C, D) Real-time RT-PCR analysis of the transcription of bcl-xL, Myb and Myc in MDA-MB-231 (C) or MCF7 (D) cells infected with lentiviruses carrying GATA1 shRNA or SET7 shRNA. Western blot shows the expression of GATA1 and SET7 (A-D). All values shown are mean  $\pm$  SD of triplicate measurements and have been repeated 3 times with similar results. \* $P < 0.05$ , \*\* $P < 0.01$ .

**A**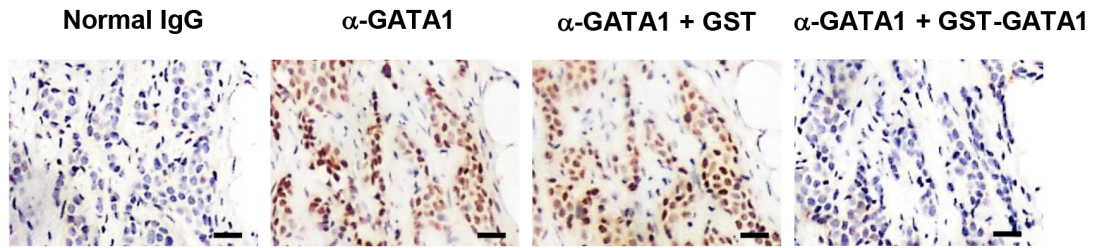**B**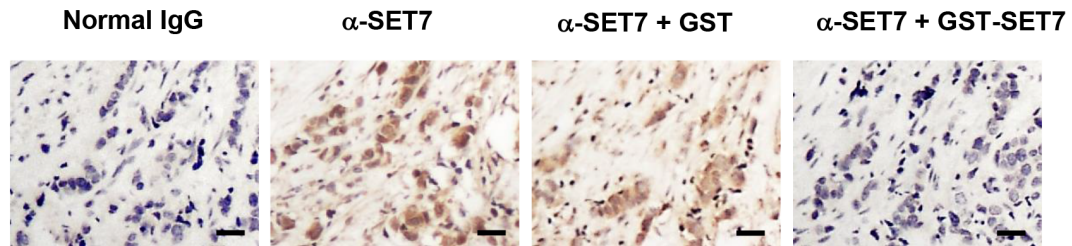**C**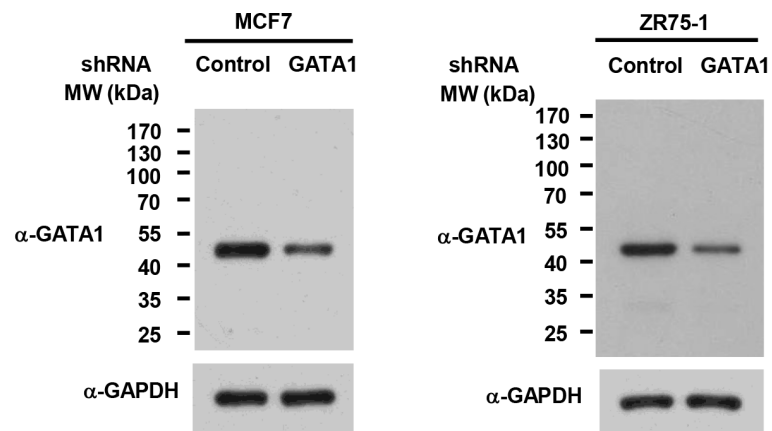**D**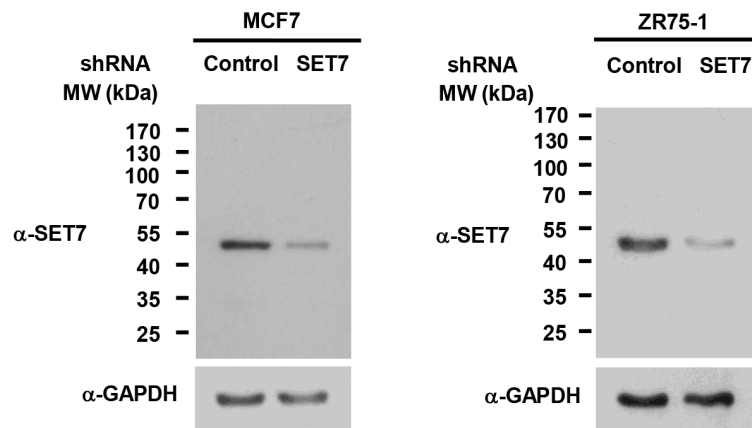

**Supplementary Figure S12: Validation of antibody specificity to GATA1 and SET7.** (A, B) Immunohistochemical staining of breast cancer samples incubated with normal IgG, anti-GATA1 (A) or anti-SET7 (B). To validate antibody specificity, the anti-GATA1 or anti-SET7 was pre-incubated with recombinant GST-GATA1 or GST-SET7 protein or GST for 1 h prior to applying to tissue. Scale bar, 25  $\mu$ m. (C, D) Western blot analysis of cell lysates from MCF7 (left panel) or ZR75-1 (right panel) cells infected with control shRNA, GATA1 shRNA or SET7 shRNA1 using antibodies specific for anti-GATA1 (C) or anti-SET7 (D).
